# Supplementary material
Source: PubMed Central journal article supplement (PMC2752275)

### **Supplementary figure legends**

#### **Supplementary Figure S1.** Validation of SIK1 knockdown by sh*SIK1s*.

(A) The knockdown efficiencies of sh*SIK1s* were analyzed by co-transfecting 293T cells with SIK1 and sh*SIK1s* or sh*Luc* as a control as indicated. Vinculin was used as a loading control. (B) Expression levels of SIK1 in tHMEC-P expressing sh*SIK1s* were determined by real-time RT-PCR and sh*Luc* was given as a control. Results are shown as the means  $\pm$  SD for 3 independent experiments.

**Supplementary Figure S2.** SIK1 knockdown does not alter p53 mRNA levels. The expression levels of p53 in tHMEC-P cells expressing various constructs as indicated were analyzed by real-time RT-PCR using TaqMan Gene Expression Assay (Applied Biosystems). Knockdown of p53 in cells expressing sh*p53* was validated and sh*Luc* was used as a control. Results are shown as the means  $\pm$  SD for 3 independent experiments.

**Supplementary Figure S3.** Loss of SIK1 results in AI colony growth. Colony formation assays of tHMEC-P cells expressing SIK1-WT, SIK1-KD, sh*SIK1#1* or vector control as indicated. The means  $\pm$  SD for 3 independent experiments are shown.

**Supplementary Figure S4.** Low expression level of SIK1 correlates with high malignant potential in ovarian cancer. The relative levels of *SIK1* expression in patient groups with low malignant potential (Grade 0, n=10), and high malignant potential (Grade 1-2, n=7; Grade 3, n=6) are shown as boxplots. The median for each group is indicated by the black center line, the first and third quantiles are the edges of the grey area, which is known as

inter-quantile range (IQR). The extreme values (within 1.5 times the inter-quantile range (IQR) from the upper or lower quantile) are the ends of the lines extending from the IQR. The difference in  $\log_2$  expression ratios between low and high malignant potential samples was tested with Welch's t-test,  $P < 0.05$ .

**Table S1 Kinase hits from a Kinome-wide shRNA screen**

| Gene    | Description                                                   | Score frequency |
|---------|---------------------------------------------------------------|-----------------|
| p53*    | tumor protein p53 (Li-Fraumeni syndrome)                      | 18              |
| SIK1    | salt-inducible kinase 1                                       | 23              |
| CAMKIIa | calcium/calmodulin-dependent protein kinase II alpha          | 8               |
| BRD2    | bromodomain containing 2                                      | 7               |
| DAPK3   | death-associated protein kinase 3                             | 7               |
| DRAK2   | DAP kinase-related apoptosis-inducing protein kinase          | 6               |
| BRDT    | bromodomain testis-specific protein                           | 5               |
| LATS1   | large tumor suppressor, homolog 1                             | 5               |
| PRKDC   | protein kinase, DNA-activated, catalytic polypeptide          | 5               |
| DYRK1A  | dual specificity tyrosine-phosphorylation-regulated kinase 1A | 5               |

This table lists 9 unique gene targets scored 5 times or more in ~300 AI colonies isolated from screen. Note, shRNA targeting p53 (marked with an asterisk) was included as a control for the screening.

**Table S2. Experimental metastasis assay**

| tHMEC-PR<br>subline | <b>Group A</b> |                                            | <b>Group B</b> |                                             |
|---------------------|----------------|--------------------------------------------|----------------|---------------------------------------------|
|                     | Frequency      | Lung diagnosis<br>(6 weeks post injection) | Frequency      | Lung diagnosis<br>(16 weeks post injection) |
| Vector              | 0/8            | No metastases                              | NA             | NA                                          |
| DDp53               | 8/8            | Metastases                                 | NA             | NA                                          |
| sh <i>TP53</i>      | 8/8            | Metastases                                 | NA             | NA                                          |
| sh <i>SIK1</i>      | 9/9            | Micrometastases                            | 6/9            | Metastases                                  |
| SIK1-KD             | 8/8            | Micrometastases                            | 8/9            | Metastases                                  |

GFP-labeled tHMEC-PR cells expressing various constructs as indicated were injected into tail veins of NOD/SCID mice and lung metastasis was assessed 6 or 16 weeks post injection as described in Materials and methods.

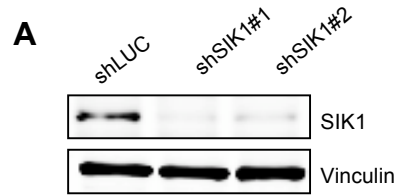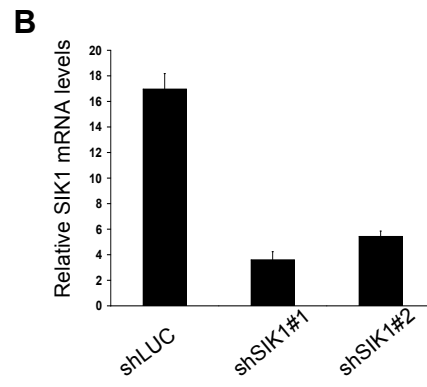

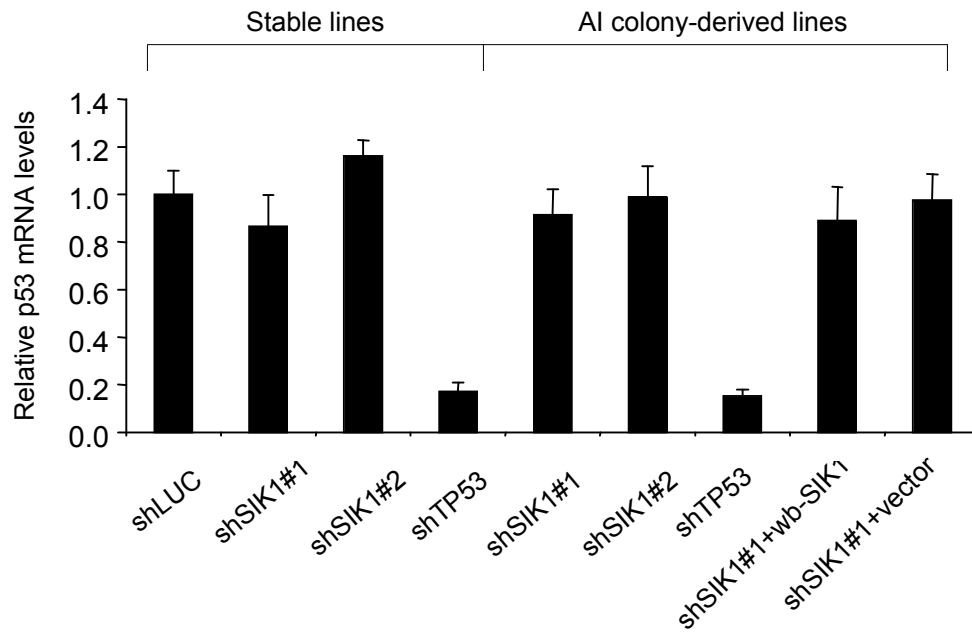

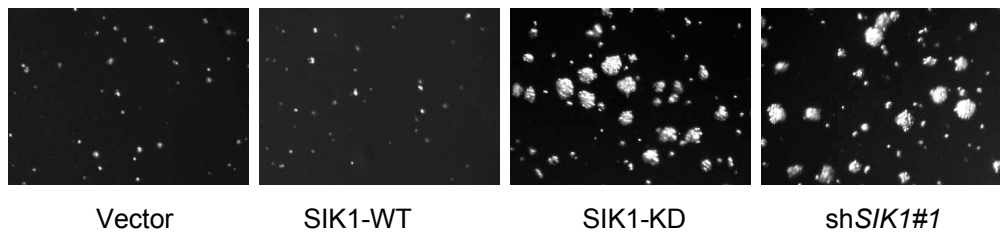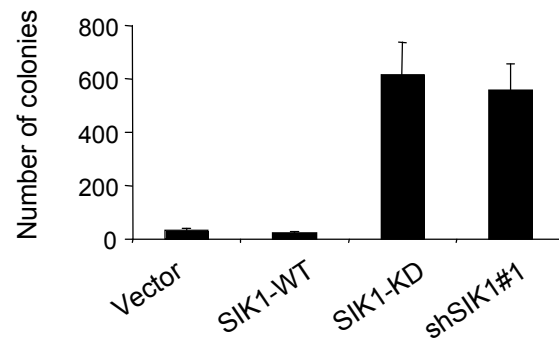

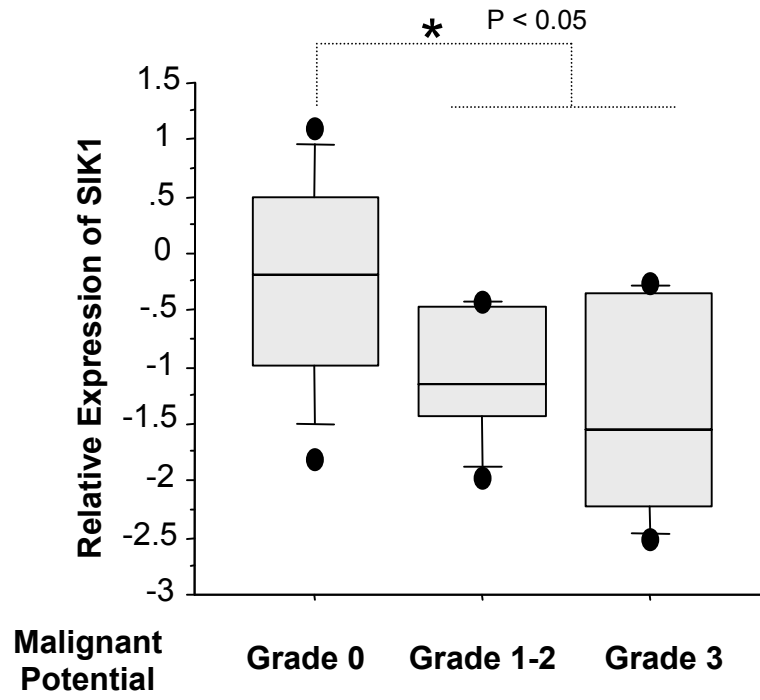

Supplement: NIHMS146187-supplement-Supplementary_Material.pdf [file NIHMS146187-supplement-Supplementary_Material.pdf]
